# Supplementary material for: Determination of fragrance ingredients in fish by ultrasound-assisted extraction followed by purge & trap
Source: Royal Society of Chemistry journal article supplement (doi:10.1039/c7ay00017k), 2017-01-01
Supplement: c7ay00017k1.pdf [file c7ay00017k1.pdf]

28 Table S1. Overall recoveries (mean  $\pm$  SD %) of surrogate standards in samples with and  
29 without matrix (blank fish) (n = 3).

| Recovery%      | LIM-d2       | HCB-C13      | AC-d4       | MX-d15      | PCB52-c13   |
|----------------|--------------|--------------|-------------|-------------|-------------|
| Without matrix | 43 $\pm$ 5.8 | 56 $\pm$ 7.9 | 55 $\pm$ 20 | 39 $\pm$ 12 | 54 $\pm$ 10 |
| With matrix    | 44 $\pm$ 8.0 | 52 $\pm$ 9.1 | 70 $\pm$ 23 | 45 $\pm$ 15 | 45 $\pm$ 12 |

30

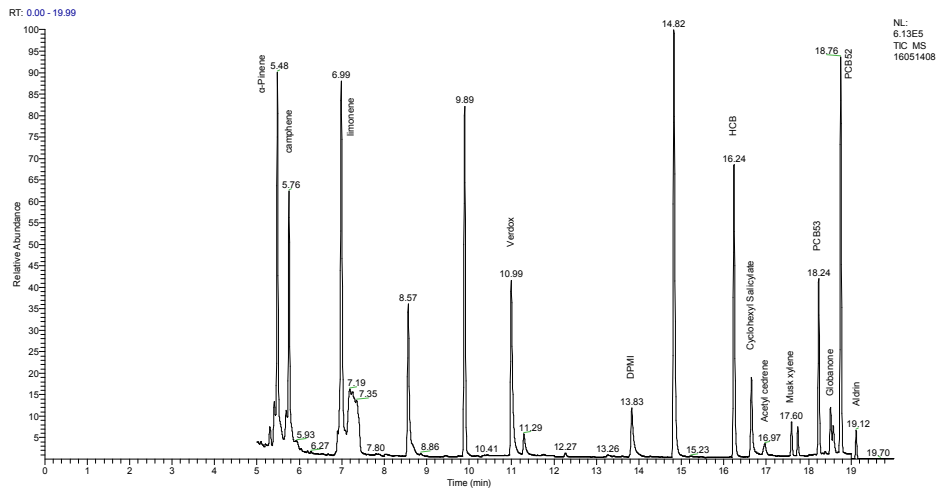

31

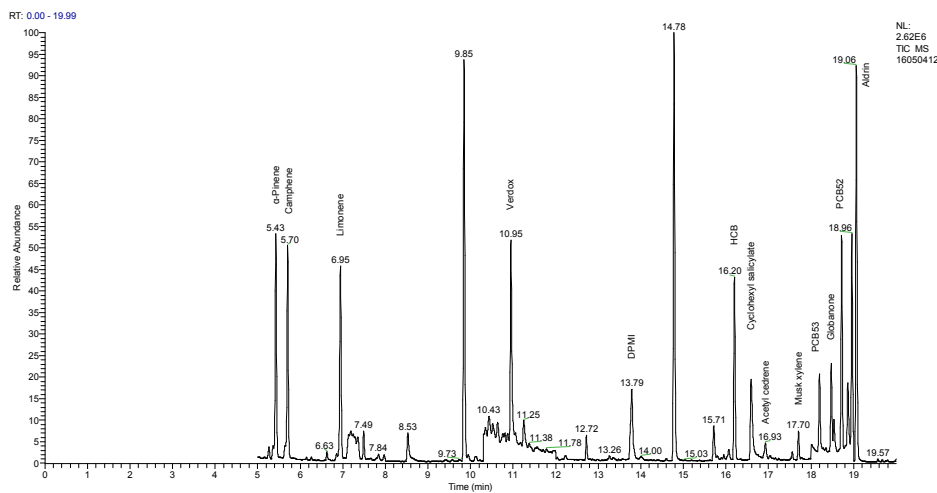

32

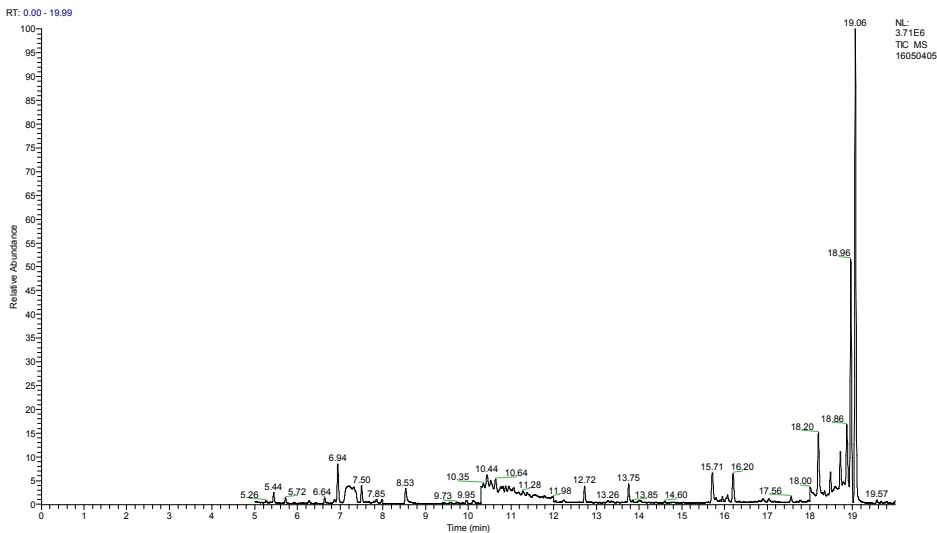

33

34 Figure S1. Sample chromatograms showing separation of the model compounds in samples  
 35 of spiked solvent (upper panel), spiked fish (middle panel) and matrix blank fish (lower  
 36 panel) on GC-MS.

37

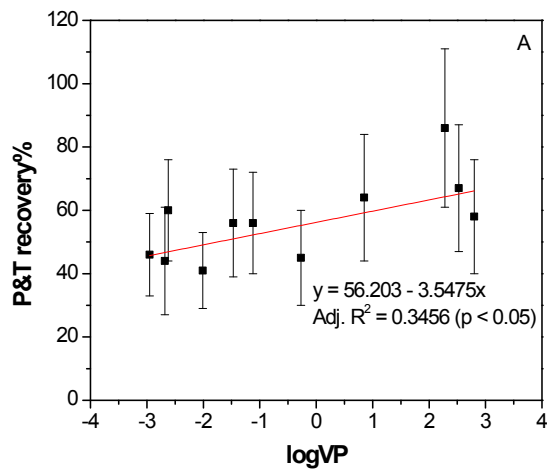

38

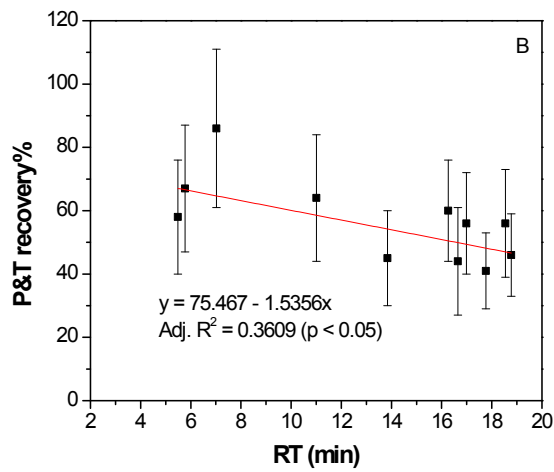

39

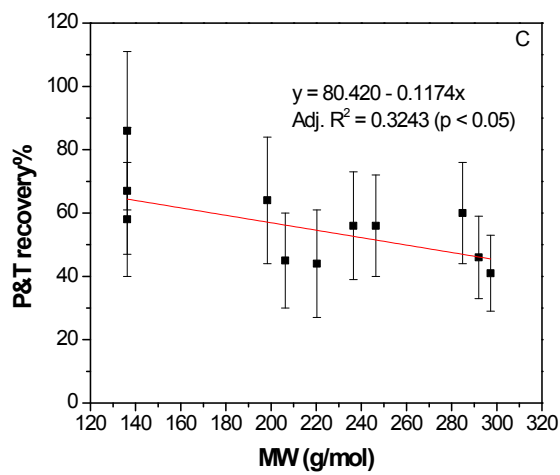

40

41 Figure S2. Recovery (absolute) of all analytes in this study as a function of logVP (A) and retention  
 42 time (RT) on GC (B) and molecular weight (MW) (C), for purge and trap step.
